# Supplementary material for: Characterization of Two Streptomyces Enzymes That Convert Ferulic Acid to Vanillin
Source: PubMed Central journal article supplement (PMC3696112; doi:10.1371/journal.pone.0067339), 2013-06-28
Supplement: pone.0067339.s002.pdf [file pone.0067339.s002.pdf]

**A**

|     |                                                                |     |
|-----|----------------------------------------------------------------|-----|
| i   | -----MRNEG-----LGSWPARRARKTPHRTALIHDRS-VTYAELYERTTRLAHLR       | 47  |
| ii  | MKDRGDMRNEG-----LGSWPARRARKTPHRTALIHGDTT-VTYAGLYERTTRLAHLR     | 54  |
| iii | -----VRNQG-----LGSWPVRRARMSPHATAVRHGGA-LTYAELSRVARLANGLR       | 47  |
| iv  | -----VRNQG-----LGSWPVRRARMSPHATAVRHGGA-LTYAELSRVARLANGLR       | 47  |
| v   | -----MRNQG-----LGSWPVRRARMSPHATAVRHGGA-LTYAELSRVARLANGLR       | 47  |
| vi  | -----MRNRG-----IGSWPARRARKTPGRVAVVHGDRV-WTYRQLHERVRLAHLR       | 47  |
| vii | MRSLEALLPFPGRILELHWAKTREPEQTCVAARAANGEWRRISYAEFMFNVRVIAQSLL    | 60  |
|     | : * : * : * . : . : . : * : * : * : * : * : *                  |     |
| i   | ARGVVRGDRVIAYLGNHPAFLETLFAAGTLGAVFVPLNIRLAEPETAYQLADSGAKALVH   | 107 |
| ii  | DSGVRRGDRVIAYLGNHPASYLETLFAAGTLGAVFVPLNIRLAGPELAYQLTDSGAKALVY  | 114 |
| iii | AAGVVRGDRVIAYLGNHPAYLETLFACGQAGAVFVPLNIRLGVPELDHALADSGASVLIH   | 107 |
| iv  | AAGVVRGDRVIAYLGNHPAYLETLFACGQAGAVFVPLNIRLGVPELDHALADSGASVLIH   | 107 |
| v   | AAGVVRGDRVIAYLGNHPAYLETLFACGQAGAVFVPLNIRLGVPELDHALADSGASVLIH   | 107 |
| vi  | GLGVGHGDRVIAYLGNHPAFLEALFAAGALGAVFVPLNSRLTAPELAFNLADSGSSVLIH   | 107 |
| vii | PTGLSAERPLLIVSGNDLEHLQAFGAMTAGIPYCPVSPAYSLLSQDLAKLRHIVGLLQP    | 120 |
|     | * : * : * . : * : * : * : * : * : *                            |     |
| i   | APSQAPPAAGPPGSTEV-----TYVEVGAAY-----EELLAASDEPID---QPVR        | 151 |
| ii  | GPTFGGLVAGLPGNSDVR-----TYVEVGAAY-----DQLLDMASDEAID---EPVI      | 158 |
| iii | TPEHAETVAALAAAGRLR-----VPAGE-----LDAADDEPPD---LPVG             | 144 |
| iv  | TPEHAETVAALAAAGRLR-----VPAGE-----LDAADDEPPD---LPVG             | 144 |
| v   | TPEHAETVAALAAAGRLR-----VPAGE-----LDAADDEPPD---LPVG             | 144 |
| vi  | APQAAAAAAGAAATGTGTRRIAVSGPDPVPHEDPG---TLDYETLLAAADTAPLD---EPVA | 162 |
| vii | GLVFAADAAPFQRAIETILPDDVPAIFTRGELAGRRTVFSDSLLEQPGGIEADNAFAATG   | 180 |
|     | . . . . . * . . . . . * . . . . .                              |     |
| i   | LDDTCIIMYTSGTTGRPKGAMLTGHNLTWNAFNVLDHDLTADERALVS---APLHHTAGL   | 209 |
| ii  | PDDTCIIMYTSGTTGRPKGAMLTGHNLTWNAFNVLDQDVIIDERALVS---APLHHTAGL   | 216 |
| iii | LDDVCLLMTYTSSTGRPKGAMLTGHNLTWNCVNVLDLADSERALVA---APLHHAAL      | 202 |
| iv  | LDDVCLLMTYTSSTGRPKGAMLTGHNLTWNCVNVLDLADSERALVA---APLHHAAL      | 202 |
| v   | LDDVCLLMTYTSSTGRPKGAMLTGHNLTWNCVNVLDLADSERALVA---APLHHAAL      | 202 |
| vi  | LDDPCVIMYTSGTTGRPKGAVLSHANITWNSVNVLDLADSERALVA---APLHHTAGL     | 220 |
| vii | FDITAKFLFTSGSTLPAKAVPTTQMLCANQQMLLQTFPVFGEPPVLDVWLPWNHTFGG     | 240 |
|     | * . . : : * * * * * * . . : : * * * * * * : * : * : * * : *    |     |
| i   | NMLTLPVLLKGGTCVLEAFDPA-----TFDLIERHRTIFMFGVPMFDQVARHFR         | 261 |
| ii  | NMLTLPVLLKGGTCVLEAFDPA-----TFDLIERHRTIFMFGVPMFEHVARHFR         | 268 |
| iii | GMVCLPTLLKGGTVILHSAPDPA-----VLSAVEQERVTLVFGVPTMYQAIAAHFR       | 254 |
| iv  | GMVCLPTLLKGGTVILHSAPDPA-----VLSAVEQERVTLVFGVPTMYQAIAAHFR       | 254 |
| v   | GMVCLPTLLKGGTVILHSAPDPA-----VLSAVEQERVTLVFGVPTMYQAIAAHFR       | 254 |
| vi  | NMTCLPTLLKGGTVILHSAPDPA-----VLELLETLVTLFGVPMYDAMAARFR          | 272 |
| vii | SHNIGIVLYNGGTYLDDGKPTAQGFATLRNLSEISPTAYLTVPRGWEEELVGLERDST     | 300 |
|     | . * : * * * * * . . . . . * : * * * * * : : : .                |     |
| i   | WDGADLSSLRILTCGGSPVPT-----PLIARYQERGLTFLQGYGMEAAAPGTLFLDAE     | 314 |
| ii  | WADADLSSLRMLSCGGSPVPT-----PLIAAYQERGLTFLQGYGMEASPGVFLDAE       | 321 |
| iii | WRSADLSSLRITLLCGGAPVPA-----DLASRYLDRGLAFVQGYGMEAAAPGVFLDRA     | 307 |
| iv  | WRSADLSSLRITLLCGGAPVPA-----DLASRYLDRGLAFVQGYGMEAAAPGVFLDRA     | 307 |
| v   | WRSADLSSLRITLLCGGAPVPA-----DLASRYLDRGLAFVQGYGMEAAAPGVFLDRA     | 307 |
| vi  | WADADLSSLRITLLCGGAPVPE-----RTLAAAYRARGLALQGGYGMEASPGVFLDRE     | 325 |
| vii | LRERFFARMKLVFFAAAGLSQGIWDRDRVAEQHCGERIRMMAGLGMTETAPSCFTTGG     | 359 |
|     | : : : : : . . : . : * * * * * : * : * : * : *                  |     |
| i   | HAVGKAGSAGVPHFFSDVRVVRPDLAPVDVGETGEIVVRGPHVMGSGYWGKPKETAEVFA-  | 373 |
| ii  | HAVTKAGSAGVPHFFSDVRVVRPDLAPADIGETGEVVRGPHVMGSGYWGKLPDETAEVFH-  | 380 |
| iii | HVAEKIGSAGVPSFFTDVRLAGPSGEPVPPGKGEIVVSGPNVMKGYWGRPEATAEVLR-    | 366 |
| iv  | HVAEKIGSAGVPSFFTDVRLAGPSGEPVPPGKGEIVVSGPNVMKGYWGRPEATAEVLR-    | 366 |
| v   | HVAEKIGSAGVPSFFTDVRLAGPSGEPVPPGKGEIVVSGPNVMKGYWGRPEATAEVLR-    | 366 |
| vi  | RIFAKAGSAGVPHFFTDVRVAGPDRVAPGEPGEILVSGPHVMTGYWGLPRQTADAFTP     | 385 |
| vii | -PLSMAGYIGLPAAGCEVPLVPVDG-----KLEGRFHGPHVMGSGYWRAPQNAQAFD-     | 410 |
|     | * * : * * : * : . . . . . * : * * * * * * : * : * : *          |     |
| i   | -DGWFRSGDAARVDD-----DGYVYIVDRIKDMIISGGENIYPAEIED-QLLAHPDIVEC   | 426 |
| ii  | -DGWFRSGDAARIDE-----DGYVTIIVDRIKDMIISGGENIYPAEIED-QLLAHPDIVEC  | 433 |
| iii | -DGWFHSGDVATVDG-----DGYFHVVDRLKDMIISGGENIYPAEVEN-ELYGYPGVEAC   | 419 |
| iv  | -DGWFHSGDVATVDG-----DGYFHVVDRLKDMIISGGENIYPAEVEN-ELYGYPGVEAC   | 419 |
| v   | -DGWFHSGDVATVDG-----DGYFHVVDRLKDMIISGGENIYPAEVEN-ELYGYPGVEAC   | 419 |
| vi  | DGGWLRRTGDVARLDE-----DGYAYVVDVVDKMYISGGENIYPAEVED-ALLGHPVAEAC  | 439 |
| vii | EEGYCSGDAIKLADPADPQKGLMFDGRIAEFDKLSGSGVFSVGLRTRAVLEGGYSVLD     | 470 |
|     | * : * * : * : . . . . . * : * * * * * : * : * : * : *          |     |
| i   | AVIGVPDD-----TWGEVPRVAVVPREGATLAPDEVIASLGRKAKYKIPKT-           | 473 |
| ii  | AVIGVPDE-----KWGEVPRVAVVPREDVALDPDEVLASLAGRLAKYKIPKS-          | 480 |
| iii | AVIGVPDP-----RWGEVGRVAVVPADGSRIDGDELLAWLRLTAGYKVPKS-           | 466 |
| iv  | AVIGVPDP-----RWGEVGRVAVVPADGSRIDGDELLAWLRLTAGYKVPKS-           | 466 |
| v   | AVIGVPDP-----RWGEVGRVAVVPADGSRIDGDELLAWLRLTAGYKVPKS-           | 466 |
| vi  | AVVGVDPD-----RWGEVGRVAVVLRPGARADEAGLLAHLHGLRKLAKYKIPKS-        | 486 |
| vii | VVVAAPDRECLGLLVPRLLDCRALSGLKEASDAEVLASEPVRVAVFADWLKRLNREATG    | 530 |
|     | * . . * * : * : . . . . . * : * : * : * : * : *                |     |
| i   | -----VVIADALPRTASGKLLKSRVRSRYGTTS-----                         | 501 |
| ii  | -----VVLADELPRTASGKLLKSRVRKRYGTNSQSKEDT-----                   | 514 |
| iii | -----VEFTDRLPTTGSGLKGEVRRRFG-----                              | 491 |
| iv  | -----VEFTDRLPTTGSGLKGEVRRRFG-----                              | 491 |
| v   | -----VEFTDRLPTTGSGLKGEVRRRFG-----                              | 491 |
| vi  | -----VVLVETLPRTASGLAKPAIRAAAYAHVADPS-----                      | 518 |
| vii | NASRIWVGLLDTPPSIDKGEVTDKGSINQRAVLQWRSKAVDALYRGEDQSMLRDEATL     | 589 |
|     | * : : * * . * : : . . . . .                                    |     |

**B**

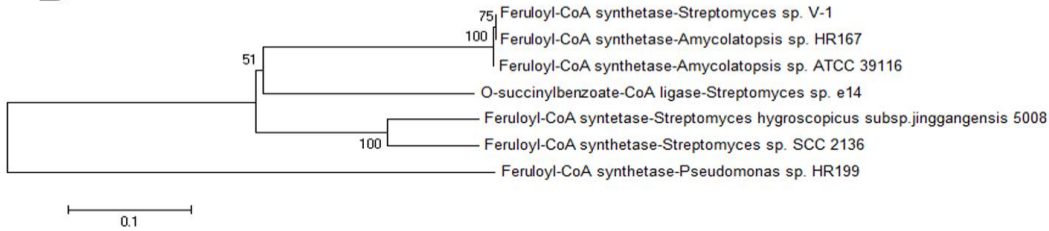

2

3 **Figure S2. Homologies of feruloyl-CoA synthetase from *Streptomyces* sp. V-1 with**

4 **the CoA ligases from various organisms. A.** The amino acid sequence of

5 feruloyl-CoA synthetase from *Streptomyces* sp. V-1 deduced from *fcs* (*iii*) was aligned

6 to: the amino acid sequence of (*i*) the feruloyl-CoA synthetase from *Streptomyces*

7 *hygroscopicus* subsp. *jinggangensis* 5008 [23], (*ii*) the feruloyl-CoA synthetase from

8 *Streptomyces* sp. SCC 2136 [24], (*iv*) the feruloyl-CoA synthetase from *Amycolatopsis*

9 sp. HR167 [10], (*v*) the acyl-CoA synthetase (AMP-forming) /AMP-acid ligase II

10 from *Amycolatopsis* sp. ATCC 39116 [8], (*vi*) the O-succinylbenzoate-CoA ligase

11 from *Streptomyces* sp. e14 (unpublished data), and (*vii*) the feruloyl-CoA synthetase

12 from *Pseudomonas* sp. HR199 [7]. Amino acids are specified by standard one-letter

13 abbreviations. *Dashes* indicate gaps introduced into the sequences to improve the

14 alignment. **B.** The relationship between the feruloyl-CoA synthetase of *Streptomyces*

15 sp. V-1 and the proteins in panel **A** was displayed as a phylogenetic tree, which was

16 constructed on the basis of the Neighbor-Joining (NJ) method using the ClustalX and

17 MEGA 5.0 softwares. The bar indicates 10% difference in amino acid sequence. The

18 number at the branch point represents the percentage of 1,000 bootstrap repetitions.
