# Supplementary material for: Characterization of Two Streptomyces Enzymes That Convert Ferulic Acid to Vanillin
Source: PubMed Central journal article supplement (PMC3696112; doi:10.1371/journal.pone.0067339), 2013-06-28
Supplement: pone.0067339.s003.pdf [file pone.0067339.s003.pdf]

# A

|     |                                                                |     |
|-----|----------------------------------------------------------------|-----|
| i   | MSTAVGNRVRTEPWGETVLFVDFEG--IAWVMLNRPDKRNMNPTLNDEMVRVLDHLEGD    | 59  |
| ii  | MSTAVGNRVRTEPWGETVLFVDFEG--IAWVMLNRPDKRNMNPTLNDEMVRVLDHLEGD    | 59  |
| iii | MSTAVGNRVRTEPWGETVLFVDFEG--IAWVMLNRPDKRNMNPTLNDEMVRVLDHLEGD    | 59  |
| iv  | -----MTEPWGNTVLFVDFEG--IAWVSLNRPDKRNMNPTLNDEMVFATLDALEGD       | 49  |
| v   | MSDNIN-----EPWGNVTLVDFEHRIAWVRFNRPDKRNMNPTLNREMFATLHLEDD       | 54  |
| vi  | MS-----TYEGRWKTVKVEIEDG--IAFVILNRPDKRNMNPTLNREIMDVLETLLEQD     | 51  |
| vii | -----MSPTLNREIMVEVLELEQD                                       | 19  |
|     | *.**** ** .*: ** *                                             |     |
| i   | DRCRVLVTGAGESFSAGMDLKEYFREVDATGSTAVQIKVRRASAEWQWKRLANWSKPTI    | 119 |
| ii  | DRCRVLVTGAGESFSAGMDLKEYFREVDATGSTAVQIKVRRASAEWQWKRLANWSKPTI    | 119 |
| iii | DRCRVLVTGAGESFSAGMDLKEYFREVDATGSTAVQIKVRRASAEWQWKRLANWSKPTI    | 119 |
| iv  | PRCRVLVTGSGDAFVAGMDLKEYFREVDATGSTAVQIKVRRASAEWQWKRLANWSKPTV    | 109 |
| v   | DRCVVVLTGSDDAFVAGMDLKEYFRETDGK--PRSVQHRVREGTNNQYRKLNLNAYKPTI   | 113 |
| vi  | PAAGVLTGAGEAWTAGMDLKEYFREVDAG--PEILQEKIRREASQWQWKRLLRMYAKPTI   | 110 |
| vii | ADARVLTGAGESWTAGMDLKEYFRETDAG--PEILQEKIRREASTWQWKRLLRMYTKPTI   | 78  |
|     | . :*****. :.:*****.* :* :.* .: **: * :*****                    |     |
| i   | AMVNGWCFGGAFVPLVACDLAFADEDARFGLSEVNWGIPPGVVSRLAATVPQRDALYY     | 179 |
| ii  | AMVNGWCFGGAFVPLVACDLAFADEDARFGLSEVNWGIPPGVVSRLAATVPQRDALYY     | 179 |
| iii | AMVNGWCFGGAFVPLVACDLAFADEDARFGLSEVNWGIPPGVVSRLAATVPQRDALYY     | 179 |
| iv  | AMVNGWCFGGAFVPLVACDLAISEDAEQYGLSEINWGIIPPGVVSRLAATVSRDALYF     | 169 |
| v   | AMVNGWCFGGAFVPLVSCDLAISEDAEQYGLSEINWGIIPPGVVSRLAATVSRDALYF     | 173 |
| vi  | AMVNGWCFGGGFVPLVACDLAICADEATFGLSEINWGIIPPGVVSRLAAMADTVGHRGSLYY | 170 |
| vii | AMVNGWCFGGGFVPLVACDLAICADEATFGLSEINWGIIPPGVVSRLAAMADTVGHRGSLYY | 138 |
|     | *****. * **:****. :.* :*****. **.*:*** * :* :***               |     |
| i   | IMTGEPPDGRRAEMRLVNEALPADRLRERTREVALKLSMNGVVLHAAKTGYKIAQEMP     | 239 |
| ii  | IMTGEPPDGRRAEMRLVNEALPADRLRERTREVALKLSMNGVVLHAAKTGYKIAQEMP     | 239 |
| iii | IMTGEPPDGRRAEMRLVNEALPADRLRERTREVALKLSMNGVVLHAAKTGYKIAQEMP     | 239 |
| iv  | IMTGEPPDGRRAEMRLVNEAVPAGRLRERTREVALKLSMNPVVMRAAKVGYKLAQEMP     | 229 |
| v   | IMTGQHPDGKRAEMRLVNEAVPADQLRARTIELALQLTSLSGWVVRGAKMGFRHSRLMS    | 233 |
| vi  | IMTGKTFGGQAAEMGLVNESVPLAQLREVTIELARNLLEKNPVVLRRAKHGFKRCRELT    | 230 |
| vii | IMTGKTFGGQAAEMGLVNSVPLAELRSVTVELAQNLLDKNPVVLRRAKIGFKRCRELT     | 198 |
|     | ***: *. * : * ***:.* ** * :* :* . . * :. ** * :. : . :         |     |
| i   | WEQAEDYLYAKLDQSQFADKAGARAKGLTQFLDQKSYRPLSAFDPEK--              | 287 |
| ii  | WEQAEDYLYAKLDQSQFADKAGARAKGLTQFLDQKSYRPLSAFDPEK--              | 287 |
| iii | WEQAEDYLYAKLDQSQFADKAGARAKGLTQFLDQKSYRPLSAFDPEK--              | 287 |
| iv  | WEQAEDYLYAKLEQSQFLDAERGRQGLSQFLDDKSYRPLSAYASE--                | 276 |
| v   | WEAAEDYLYAKHDQAILFDTD--AREQGMTQFLDDKTYRPLGTYATTAE              | 281 |
| vi  | WEQNEEDYLYAKLDQSRLLDTEGGREGMKQFLDDKSIKPLGQAYKR---              | 276 |
| vii | WEQNEEDYLYAKLDQSRLLDTEGGREGMKQFLDDKSIKPLGQTYKR---              | 244 |
|     | ** ***** :* : * . * :.* :*****: :*** :                         |     |

# B

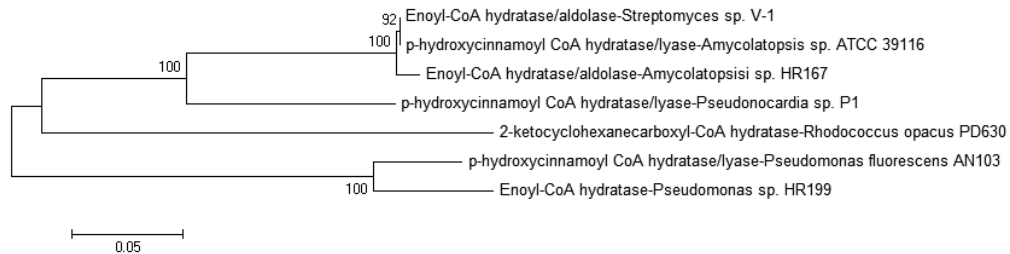

1

2

3 **Figure S3. Homologies of enoyl-CoA hydratase/aldolase from *Streptomyces* sp.**

4 **V-1 with the CoA hydratases/aldolases from different organisms. A.** The amino

5 acid sequence of enoyl-CoA hydratase/aldolase from *Streptomyces* sp. V-1 deduced

6 from *ech* gene (i) was aligned to: the amino acid sequence of (ii) the

7 *p*-hydroxycinnamoyl CoA hydratase/lyase from *Amycolatopsis* sp. ATCC 39116 [8],

8 (iii) the enoyl-CoA hydratase/aldolase from *Amycolatopsis* sp. HR167 [10], (iv) the

9 *p*-hydroxycinnamoyl CoA hydratase/lyase from *Pseudonocardia* sp. P1 (unpublished  
10 data), (v) the 2-ketocyclohexanecarboxyl-CoA hydratase from *Rhodococcus opacus*  
11 PD630 [29], (vi) the *p*-hydroxycinnamoyl CoA hydratase/lyase from *Pseudomonas*  
12 *fluorescens* AN103 [13], and (vii) the enoyl-CoA hydratase from *Pseudomonas* sp.  
13 HR199 [7]. Amino acids are specified by standard one-letter abbreviations. *Dashes*  
14 indicate gaps introduced into the sequences to improve the alignment. **B.** The  
15 relationship between the enoyl-CoA hydratase/aldolase from *Streptomyces* sp. V-1 and  
16 the proteins in panel **A** was displayed as a phylogenetic tree, which was constructed  
17 on the basis of the Neighbor-Joining (NJ) method using the ClustalX and MEGA 5.0  
18 softwares. The bar indicates 10% difference in amino acid sequence. The number at  
19 the branch point represents the percentage of 1,000 bootstrap repetitions.
