# Supplementary material for: Characterization of Two Streptomyces Enzymes That Convert Ferulic Acid to Vanillin
Source: PubMed Central journal article supplement (PMC3696112; doi:10.1371/journal.pone.0067339), 2013-06-28
Supplement: pone.0067339.s004.pdf [file pone.0067339.s004.pdf]

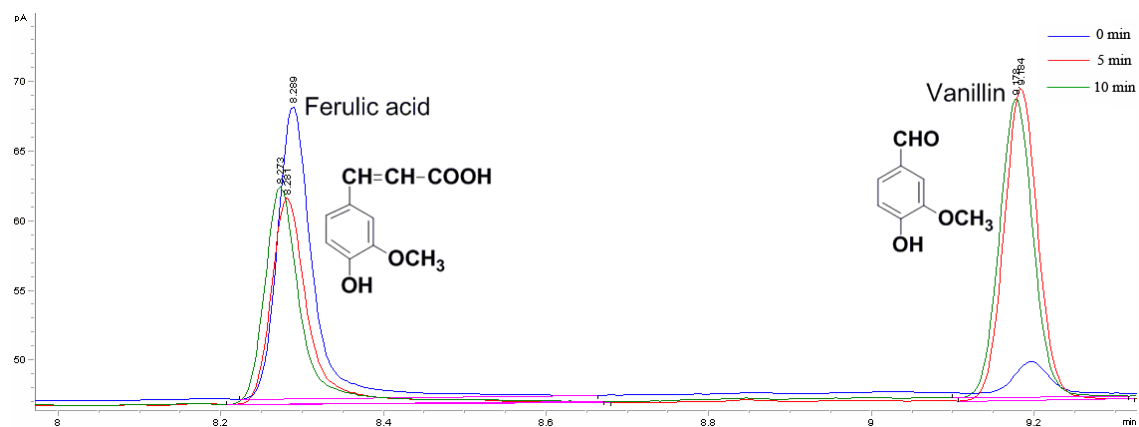

1  
2

3 **Figure S4. GC spectrum of the conversion from ferulic acid to vanillin by both**  
 4 **Fcs and Ech.** The three lines indicate samples obtained at 0 min (blue), 5 min (red),  
 5 and 10 min (green) during the enzymatic reactions with two purified proteins Fcs and  
 6 Ech in the reaction mixture.
