# Supplementary material for: Characterization of Two Streptomyces Enzymes That Convert Ferulic Acid to Vanillin
Source: PubMed Central journal article supplement (PMC3696112; doi:10.1371/journal.pone.0067339), 2013-06-28
Supplement: pone.0067339.s005.pdf [file pone.0067339.s005.pdf]

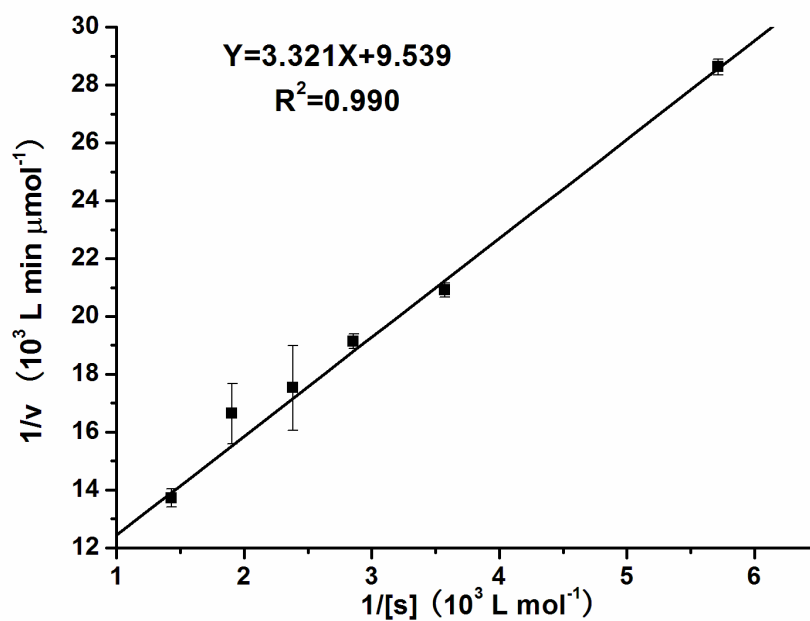

1

2

3 **Figure S5. Determination of the kinetic constants of Fcs.** Michaelis-Menten and

4 Lineweaver-Burk reciprocal plots of Fcs were determined by changing the

5 concentration of the substrate (ferulic acid) from 0.175 mM to 0.7 mM. Values

6 represent the means of three independent experiments; the error bars represent

7 standard deviations.
